# Supplementary material
Source: PubMed Central journal article supplement (PMC4006719)
Supplement: NIHMS573497-supplement-Suppl_data.pdf [file NIHMS573497-supplement-Suppl_data.pdf]

## Supplementary Materials

### Supplementary Notes regarding behavior studies, Fig. S1, S3 and S5:

#### Granule cell precursor proliferation assay

The activity of the single batch of SAG used in our experiments, was compared to the concentration that caused similar GCP proliferation as 5 nM of dually lipidated Shh (Shh-Np) in an in vitro assay (Fig. S1) with isolated GCPs from P6-P7 cerebella. We note that absolute values of GCP responsiveness are influenced by differences in genetic background, age or maturity of the mice and do not necessarily provide a reproducible metric for comparison across laboratories. However, all four previous reports of in vivo SAG response used the same or a similar final dose of 20 µg/g (10, 16-18) that were administered to the mice used in our experiments..

#### Morris Water Maze Strategy Choice

As demonstrated here, a single treatment with SAG at P0 normalized performance of adult Ts65Dn mice in the MWM (Fig. 2). Recent studies have highlighted a role for the cerebellum in spatial learning, proposing that it is necessary in the acquisition of optimal strategies for spatial learning in tasks such as the MWM hidden platform (33). Accordingly, we analyzed search strategies used by control and SAG treated trisomic mice based on the path to the platform (Fig. S5). Scores correlated significantly with the latency for all groups (Spearman's  $\rho > 0.80$ ), indicating that reduced latencies for both TsSAG and EuVeh compared to TsVeh were due to the use of improved strategies for platform finding.

TsVeh mice frequently showed a behavior in which they continued to swim against the wall in a single quadrant and did not seem to be making an attempt to look for the platform at all. This behavior is a form of thigmotaxis which has been noted previously in Ts65Dn mice (35). This behavior was added to the 10 point scale of Petrosini et al. (38) and given a score of 11.

Search pattern 11 was seen predominantly in TsVeh animals (Fig. S5b). All the scores were based on spatial strategy, except score 11 which could be a mixture of behavior and spatial learning. All trajectories were scored by investigators blinded to genotype and treatment, as well as to trial number (attempt number within a trial was differentiated using color coding) to remove any bias.

**Supplementary Figures****Fig. S1.**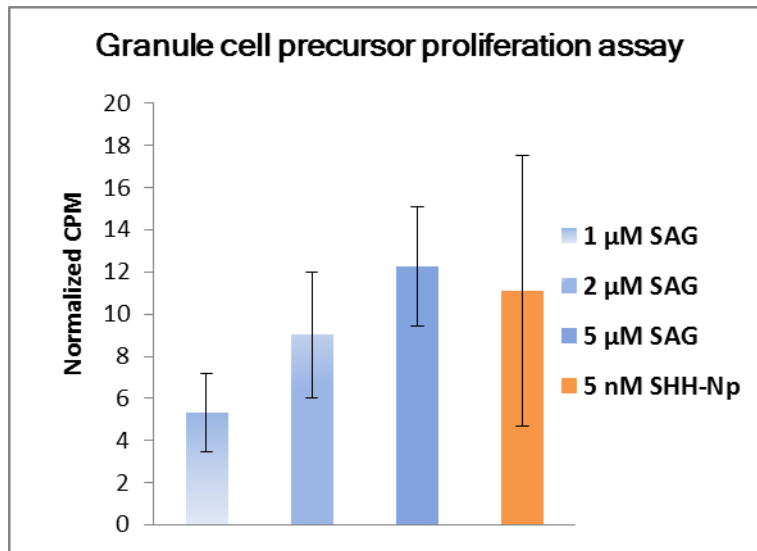

**Fig. S1. Mitogenic activity of SAG in primary GCP cultures.** Granule cell precursors (GCPs) isolated from P6-P7 pups as described (10) were exposed to 1 μM, 2 μM and 5 μM SAG, with each concentration present in three technical replicates in the same plate. GCPs treated with dually lipidated SHH (SHH-Np) acted as the positive control. Blue and orange bar(s) display the incorporation of tritiated thymidine by cells 8 hrs after exposure to SAG and SHH-Np, respectively. The results shown are the average derived from four independent experiments. CPM, counts per minute.

**Fig. S2.**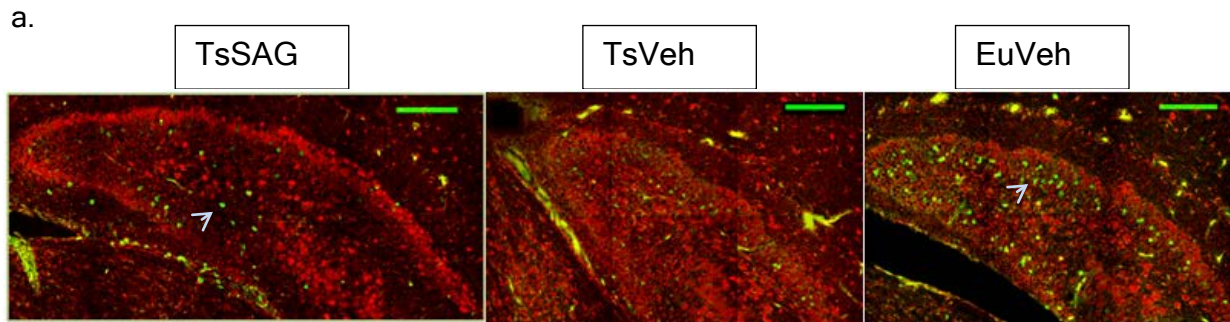

b.

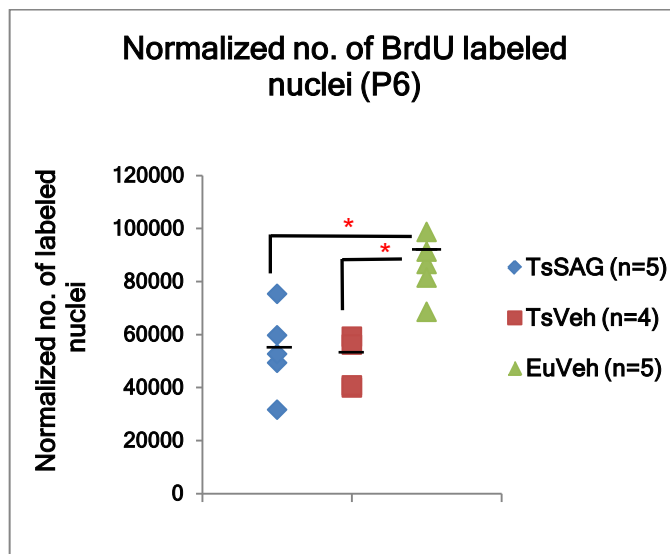

**Fig.S2. Dentate gyrus is not affected by SAG treatment.** Pups were co-injected with SAG and BrdU at P0 and the dentate gyrus was analyzed for cells stimulated to divide (visualized by 'green' signal, indicating BrdU incorporation) at P6. a) Representative high power images from each treatment group, white arrows point to BrdU labeled nuclei. Scale Bar: 100  $\mu$ m. b) SAG treatment did not change the significant deficit in number of cells in the dentate gyrus, seen in trisomic mice (\*Univariate ANOVA  $p = 0.002$ , was followed by Fisher's LSD for pairwise comparison: EuVeh vs TsSAG  $p = 0.003$ , Euveh vs TsVeh,  $p = 0.001$ )).

**Fig. S3.**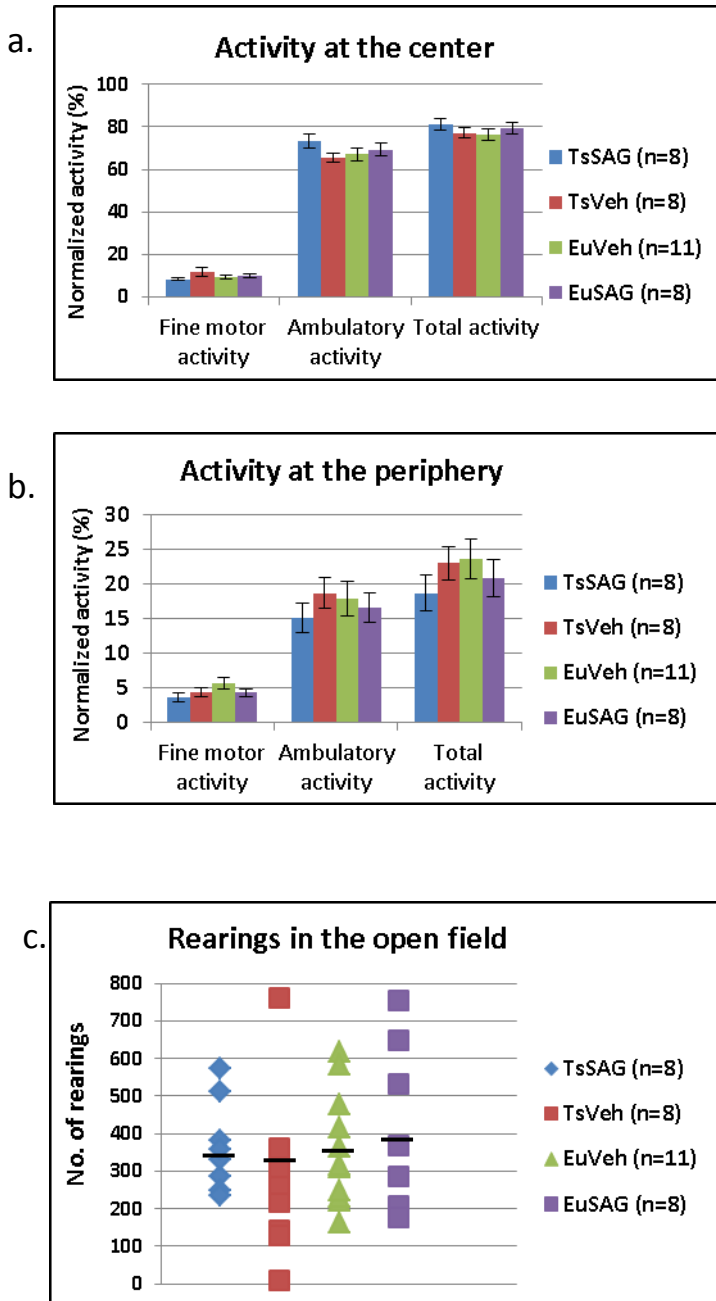

**Fig. S3. SAG treatment does not affect open field performance.** Normalized activity was defined as the number of beam breaks (when a part or whole of the mouse body interrupted one or more laser beams) at the center or periphery divided by the total number of beam breaks by the mouse. This was further categorized as fine motor activity (if the same beam was broken

twice sequentially) or ambulatory activity (if contiguous beams were broken). Data shown are from both phases of open field testing. a-c) Ts65Dn mice showed little or change in activity in open field measures at the center or at the periphery of the arena and were unaffected by SAG treatment. SAG also had no demonstrable effect on the performance of euploid mice. There was also no significant difference in the number of rearings between the four test groups (MANOVA, Wilk's Lambda = 0.590, p value = 0.621). P values in pairwise comparisons using Fisher's LSD for: ambulatory motor activity at the center: EuVeh vs TsSAG = 0.157, TsSAG vs TsVeh = 0.100, EuVeh vs TsVeh = 0.705; ambulatory activity at the periphery: EuVeh vs TsSAG = 0.426, TsSAG vs TsVeh = 0.346, EuVeh vs TsVeh = 0.825; fine motor activity at the center: EuVeh vs TsSAG = 0.520, TsSAG vs TsVeh = 0.109, EuVeh vs TsVeh = 0.267; fine motor activity at the periphery: EuVeh vs TsSAG = 0.072, TsSAG vs TsVeh = 0.554, EuVeh vs TsVeh = 0.228; number of rearings EuVeh vs TsSAG = 0.930, TsSAG vs TsVeh = 0.292, EuVeh vs TsVeh = 0.294.

Fig. S4.

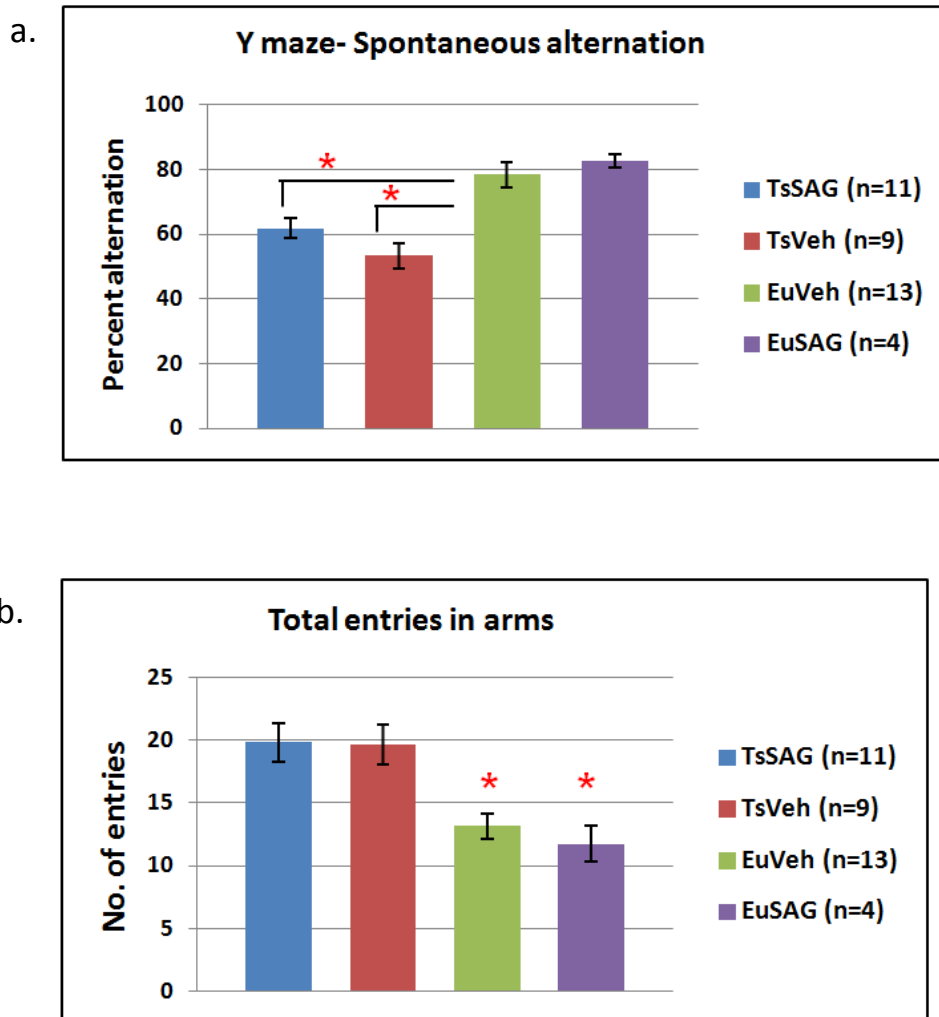

**Fig. S4. SAG treatment does not improve Y maze performance in Ts65Dn mice.** a) SAG-treated Ts65Dn mice did not show a significant improvement in the Y maze spontaneous alternation task for working memory (\* EuVeh vs TsSAG,  $p$  value = 0.010; EuVeh vs TsVeh  $p$  value = 0.0001). b) Ts65Dn mice showed significantly more arm entries than do euploid mice, and this increased activity was not affected by SAG treatment (\* EuVeh vs TsSAG,  $p$  value = 0.003; EuVeh vs TsVeh  $p$  value = 0.006). For the Y maze, spontaneous alternation and number of entries in the arms were tested using MANOVA. We determined the value of Wilks' Lambda (Wilk's Lambda= 0.011,  $p$  value = 0.0001) followed by multiple pairwise comparisons using the Bonferroni method. Error bars are SEM.

Fig. S5.

a.

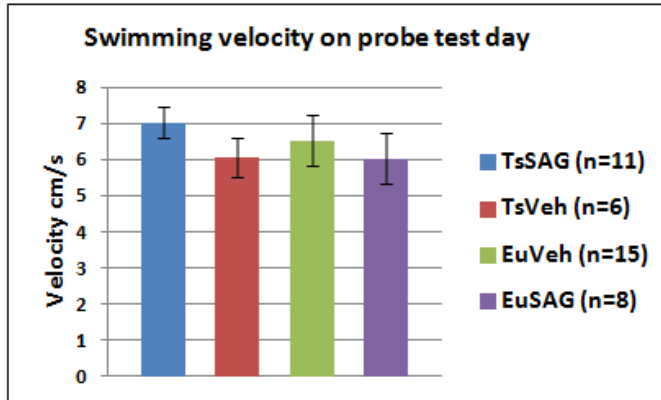

b.

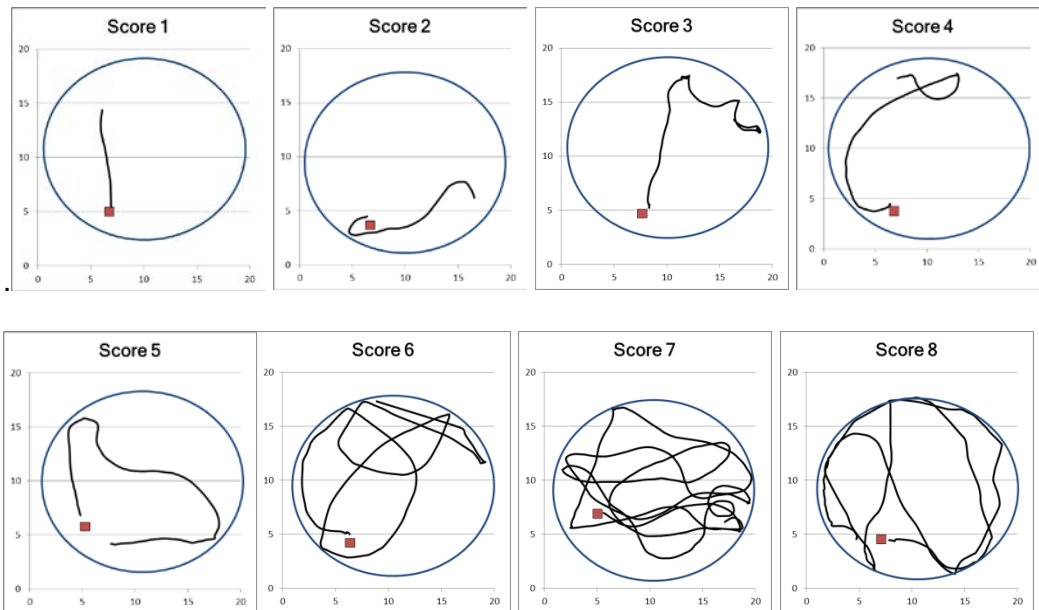



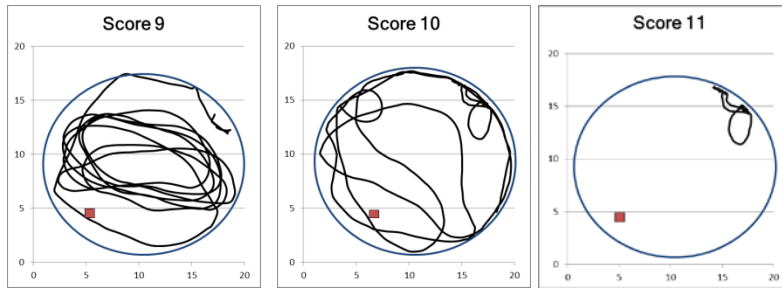

C.

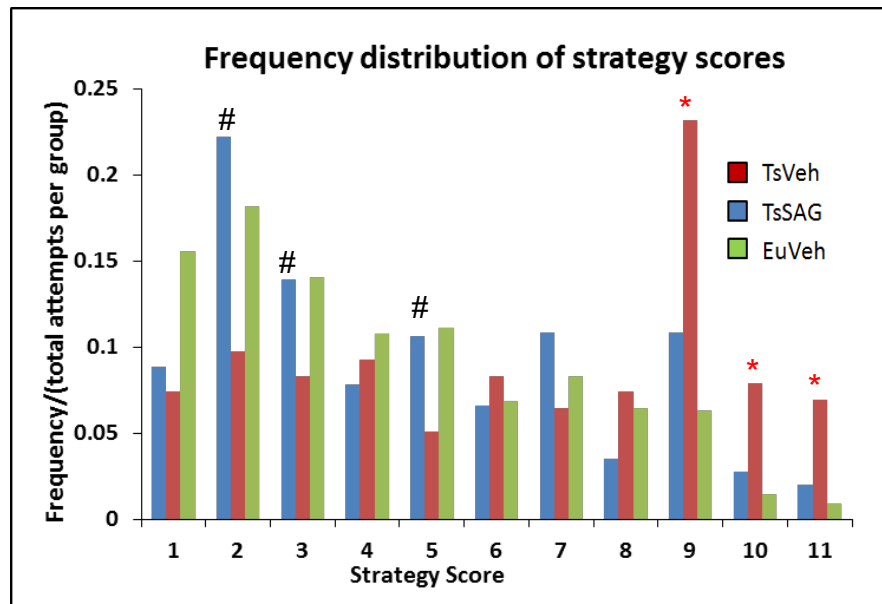

**Fig. S5.SAG treatment normalizes search strategies of Ts65Dn mice in the MWM.**

a) Swimming speed was not significantly different for any group. b) MWM search strategies used on day 3 of testing representing each of 11 categories. Shown are actual trajectories of individual mice recorded during the testing phase. Red square represents the platform position. c) Analysis of strategy scores for the three test groups demonstrates consistent use of efficient (short pathway) strategies by EuVeh and TsSAG, and impaired strategies including thigmotaxis (Score 9, 10 and 11) by TsVeh. \* increased frequency seen in TsVeh compared to TsSAG, p value in Fisher's exact test, two-tailed: strategy score 9 = 6.07E-05 , strategy score 10 = 0.0049, strategy score 11 = 0.003. # increased frequency in TsSAG compared to TsVeh, p values for

3005983

Fisher's exact test, two-tailed: TsSAG vs TsVeh: strategy score 2 = 0.00015., strategy score 3 = 0.049, strategy score 5 = 0.023. In all scores except strategy score 1 (for which TsSAG vs EuVeh p value = 0.0027), TsSAG and EuVeh showed no significant difference in frequency of occurrence.

### Supplementary Tables.

**TableS1. Cerebellar morphological measurements.**

TsSAG (n=8), TsVeh (n=5) and EuVeh (n=8).

| Animal no. | Group ID | GC density (no. of cells per $\mu\text{m}^2$ ) | Cb area ( $\text{mm}^2$ ) | Normalized Cb area | Total Brain area ( $\text{mm}^2$ ) |
|------------|----------|------------------------------------------------|---------------------------|--------------------|------------------------------------|
| 59         | TsSAG    | 0.0227                                         | 7.568                     | 0.168              | 45.03                              |
| 65         | TsSAG    | 0.0198                                         | 7.474                     | 0.163              | 45.73                              |
| 7          | TsSAG    | 0.0231                                         | 7.035                     | 0.166              | 42.41                              |
| 11         | TsSAG    | 0.0182                                         | 6.8735                    | 0.142              | 48.24                              |
| 12         | TsSAG    | 0.0218                                         | 6.5595                    | 0.165              | 39.65                              |
| 13         | TsSAG    | 0.0235                                         | 8.1515                    | 0.172              | 47.36                              |
| 20         | TsSAG    | 0.0213                                         | 7.859                     | 0.156              | 50.32                              |
| 21         | TsSAG    | 0.0230                                         | 8.307                     | 0.161              | 51.56                              |
| 54         | TsVeh    | 0.0205                                         | 6.388                     | 0.143              | 44.57                              |
| 55         | TsVeh    | 0.0166                                         | 6.888                     | 0.146              | 47.06                              |
| 56         | TsVeh    | 0.0197                                         | 7.859                     | 0.134              | 58.76                              |
| 61         | TsVeh    | 0.0178                                         | 7.607                     | 0.147              | 51.66                              |
| 62         | TsVeh    | 0.0175                                         | 7.049                     | 0.144              | 48.84                              |
| 58         | EuVeh    | 0.0198                                         | 8.061                     | 0.159              | 50.68                              |
| 63         | EuVeh    | 0.0220                                         | 8.7575                    | 0.178              | 49.23                              |
| 64         | EuVeh    | 0.0186                                         | 8.8045                    | 0.179              | 49.27                              |
| 22         | EuVeh    | 0.0245                                         | 6.0415                    | 0.143              | 42.22                              |
| 25         | EuVeh    | 0.0263                                         | 7.217                     | 0.170              | 42.51                              |
| 32         | EuVeh    | 0.0227                                         | 7.7665                    | 0.167              | 46.55                              |
| 18         | EuVeh    | 0.0256                                         | 7.4895                    | 0.178              | 41.99                              |
| 19         | EuVeh    | 0.0249                                         | 7.4235                    | 0.193              | 38.37                              |

**Table S2. Dentate gyrus granule cell number is not affected at P6 (hematoxylin stained).**

TsSAG (n = 5), TsVeh (n = 3), EuVeh (n = 4) and EuSAG (n = 8).

| <b>Animal no.</b> | <b>GroupID</b> | <b>GC no.</b> |
|-------------------|----------------|---------------|
| 1                 | EuSAG          | 685204        |
| 2                 | EuSAG          | 726377        |
| 3                 | EuSAG          | 616688        |
| 4                 | EuSAG          | 636527        |
| 5                 | EuSAG          | 561985        |
| 6                 | EuSAG          | 640313        |
| 7                 | EuSAG          | 725676        |
| 8                 | EuSAG          | 582229        |
| 9                 | EuVeh          | 679578        |
| 10                | EuVeh          | 819879        |
| 11                | EuVeh          | 558644        |
| 12                | EuVeh          | 669963        |
| 13                | TsSAG          | 518310        |
| 14                | TsSAG          | 617336        |
| 15                | TsSAG          | 634008        |
| 16                | TsSAG          | 496466        |
| 17                | TsSAG          | 549149        |
| 18                | TsVeh          | 556397        |
| 19                | TsVeh          | 606261        |
| 20                | TsVeh          | 449645        |

**Table S3. BrdU positive cells in the dentate gyrus at P6.**  
TsSAG (n = 5), TsVeh (n = 4) and EuVeh (n = 5).

| <b>Animal no.</b> | <b>Group ID</b> | <b>Normalized no. of BrdU positive cells in DG</b> |
|-------------------|-----------------|----------------------------------------------------|
| S7-3              | EuVeh           | 98722.83                                           |
| S7-1              | EuVeh           | 86637.69                                           |
| S7-4              | EuVeh           | 91305.45                                           |
| T33-3             | EuVeh           | 81510.48                                           |
| T45-1             | EuVeh           | 68591.12                                           |
| T48-2             | TsSAG           | 75355.13                                           |
| T30-4             | TsSAG           | 49345.49                                           |
| T44-2             | TsSAG           | 31655.94                                           |
| T48-3             | TsSAG           | 52680.66                                           |
| T30-3             | TsSAG           | 59719.37                                           |
| T33-1             | TsVeh           | 40043.92                                           |
| T33-2             | TsVeh           | 59180.10                                           |
| T45-2             | TsVeh           | 40812.71                                           |
| S7-2              | TsVeh           | 56219.73                                           |

**Table S4. Electrophysiological measurements from cerebellar Purkinje cells** (number of cells).

## (a) Measurements from Lobule III

|                           | Euploid           |                  | Ts65Dn                                                   |                                                          |
|---------------------------|-------------------|------------------|----------------------------------------------------------|----------------------------------------------------------|
|                           | vehicle           | SAG              | vehicle                                                  | SAG                                                      |
| Rise time (ms)            | 3.57 ± 0.55 (12)  | 3.10 ± 0.93 (6)  | 3.13 ± 0.75 (13)                                         | 2.97 ± 0.60 (14)                                         |
| Decay tau (ms)            | 18.31 ± 4.59 (12) | 18.79 ± 4.34 (6) | 16.91 ± 5.71 (13)                                        | 14.26 ± 4.62 (14)                                        |
| Paired-pulse ratio        | 1.93 ± 0.26 (12)  | 1.84 ± 0.30 (6)  | 1.63 ± 0.12 (13)<br>p=0.001 vs.EuVeh<br>p=0.042 vs.EuSAG | 1.70 ± 0.23 (14)<br>p=0.024 vs.EuVeh                     |
| *EPSC after LTD induction | 0.89 ± 0.17 (12)  | 0.83 ± 0.22 (8)  | 0.84 ± 0.18 (13)                                         | 0.66 ± 0.18 (14)<br>p=0.003 vs.EuVeh<br>p=0.019 vs.TsVeh |

## (b) Measurements from Lobule IX

|                           | Euploid            |                                     | Ts65Dn                               |                   |
|---------------------------|--------------------|-------------------------------------|--------------------------------------|-------------------|
|                           | vehicle            | SAG                                 | vehicle                              | SAG               |
| Rise time (ms)            | 3.76 ± 0.93 (16)   | 4.08 ± 0.33 (7)                     | 3.78 ± 1.01 (15)                     | 3.53 ± 0.59 (14)  |
| Decay tau (ms)            | 21.04 ± 11.30 (16) | 24.13 ± 7.94 (7)                    | 20.31 ± 8.00 (15)                    | 19.45 ± 5.95 (14) |
| Paired-pulse ratio        | 1.86 ± 0.28 (16)   | 1.50 ± 0.17 (7)<br>p=0.005 vs.EuVeh | 1.52 ± 0.20 (15)<br>p=0.001 vs.EuVeh | 1.72 ± 0.32 (14)  |
| *EPSC after LTD induction | 0.77 ± 0.32 (16)   | 0.61 ± 0.13 (9)                     | 0.66 ± 0.24 (15)                     | 0.73 ± 0.16 (14)  |

\* Normalized amplitude of EPSCs 35 minutes after the LTD induction.

**Table S5. Open field activity**

| GroupID/<br>no. | Center                    |                               |                   | Periphery                 |                  |                   | Rearings |
|-----------------|---------------------------|-------------------------------|-------------------|---------------------------|------------------|-------------------|----------|
|                 | Fine<br>motor<br>activity | Amb.<br>activity <sup>a</sup> | Total<br>activity | Fine<br>motor<br>activity | Amb.<br>Activity | Total<br>activity |          |
| TsSAG1          | 6.2                       | 89.3                          | 95.5              | 0.6                       | 3.9              | 4.5               | 574.0    |
| TsSAG 2         | 8.5                       | 72.3                          | 80.8              | 4.1                       | 15.1             | 19.2              | 285.0    |
| TsSAG 3         | 4.6                       | 84.6                          | 89.2              | 1.5                       | 9.3              | 10.8              | 250.0    |
| TsSAG 4         | 7.3                       | 68.7                          | 76.1              | 3.8                       | 20.2             | 23.9              | 513.0    |
| TsSAG 5         | 11.2                      | 61.0                          | 72.3              | 5.6                       | 22.1             | 27.7              | 330.0    |
| TsSAG 6         | 8.1                       | 76.7                          | 84.8              | 2.7                       | 12.5             | 15.2              | 381.0    |
| TsSAG 7         | 10.5                      | 68.1                          | 78.5              | 5.4                       | 16.1             | 21.5              | 236.0    |
| TsSAG 8         | 8.7                       | 64.5                          | 73.2              | 5.4                       | 21.4             | 26.8              | 358.0    |
| TsVeh1          | 6.7                       | 61.0                          | 67.7              | 4.7                       | 27.6             | 32.3              | 361.0    |
| TsVeh2          | 6.7                       | 74.8                          | 81.5              | 2.3                       | 16.2             | 18.5              | 144.0    |
| TsVeh3          | 11.5                      | 66.4                          | 77.8              | 3.9                       | 18.3             | 22.2              | 218.0    |
| TsVeh4          | 7.6                       | 64.6                          | 72.2              | 4.3                       | 23.6             | 27.8              | 130.0    |
| TsVeh5          | 9.3                       | 56.9                          | 66.2              | 6.8                       | 27.0             | 33.8              | 266.0    |
| TsVeh6          | 7.9                       | 74.7                          | 82.6              | 3.1                       | 14.3             | 17.4              | 760.0    |
| TsVeh7          | 23.4                      | 58.8                          | 82.1              | 7.0                       | 10.8             | 17.9              | 8.0      |
| TsVeh8          | 19.6                      | 66.2                          | 85.8              | 2.5                       | 11.7             | 14.2              | 311.0    |
| EuVeh1          | 10.4                      | 72.9                          | 83.3              | 6.0                       | 10.7             | 16.7              | 163.0    |
| EuVeh2          | 10.6                      | 69.9                          | 80.6              | 4.1                       | 15.3             | 19.4              | 311.0    |
| EuVeh3          | 9.3                       | 70.1                          | 79.4              | 5.0                       | 15.6             | 20.6              | 364.0    |
| EuVeh4          | 4.3                       | 84.4                          | 88.8              | 0.9                       | 10.4             | 11.2              | 619.0    |
| EuVeh5          | 9.4                       | 79.8                          | 89.2              | 2.0                       | 8.8              | 10.8              | 582.0    |
| EuVeh6          | 13.6                      | 61.8                          | 75.4              | 7.5                       | 17.1             | 24.6              | 221.0    |
| EuVeh7          | 7.3                       | 61.5                          | 68.8              | 6.6                       | 24.6             | 31.2              | 477.0    |
| EuVeh8          | 14.2                      | 65.8                          | 80.0              | 4.6                       | 15.4             | 20.0              | 231.0    |
| EuVeh9          | 5.3                       | 49.4                          | 54.7              | 6.1                       | 39.2             | 45.3              | 417.0    |
| EuVeh10         | 8.4                       | 59.1                          | 67.5              | 8.3                       | 24.2             | 32.5              | 316.0    |
| EuVeh11         | 10.4                      | 62.5                          | 72.9              | 11.5                      | 15.6             | 27.1              | 247.0    |

<sup>a</sup>Ambulatory activity

**Table S6. Total number of entries and percent alternation in Y maze.**  
TsSAG (n = 11), TsVeh (n = 9) and EuVeh (n=13).

| Animal no. | GroupID | % alternation | Total no. of entries |
|------------|---------|---------------|----------------------|
| b2679      | TsSAG   | 66.67         | 26                   |
| b2696      | TsSAG   | 72.73         | 13                   |
| b2624      | TsSAG   | 60.00         | 17                   |
| b2700      | TsSAG   | 52.94         | 19                   |
| b2688      | TsSAG   | 57.14         | 23                   |
| Y-C-11     | TsSAG   | 36.00         | 27                   |
| Y-C-12     | TsSAG   | 73.33         | 17                   |
| Y-C-13     | TsSAG   | 66.67         | 14                   |
| Y-C-7      | TsSAG   | 60.87         | 25                   |
| Y-C-20     | TsSAG   | 69.23         | 15                   |
| Y-C-21     | TsSAG   | 65.00         | 22                   |
| b2685      | TsVeh   | 66.67         | 17                   |
| b2667      | TsVeh   | 42.86         | 23                   |
| b2663      | TsVeh   | 66.67         | 20                   |
| b2669      | TsVeh   | 52.38         | 23                   |
| b2677      | TsVeh   | 57.14         | 13                   |
| b2664      | TsVeh   | 31.82         | 24                   |
| b2682      | TsVeh   | 48.00         | 27                   |
| Y-C-15     | TsVeh   | 50.00         | 14                   |
| Y-C-29     | TsVeh   | 64.29         | 16                   |
| b2666      | Euveh   | 80.00         | 17                   |
| b2668      | Euveh   | 66.67         | 14                   |
| b2670      | Euveh   | 71.43         | 9                    |
| b2673      | Euveh   | 69.23         | 15                   |
| b2674      | Euveh   | 78.57         | 16                   |
| Y-C-22     | Euveh   | 47.37         | 21                   |
| Y-C-16     | Euveh   | 66.67         | 8                    |
| Y-C-17     | Euveh   | 100.00        | 11                   |
| Y-C-25     | Euveh   | 85.71         | 9                    |
| Y-C-32     | Euveh   | 80.00         | 12                   |
| Y-C-26     | Euveh   | 81.82         | 13                   |
| Y-C-27     | Euveh   | 100.00        | 13                   |
| Y-C-28     | Euveh   | 90.91         | 13                   |



**Table S7. Latencies in the MWM Visible platform test (seconds).**  
TsSAG (n=11), TsVeh (n=6) and EuVeh (n=15).

| Animal no. | Group ID | Avg latency Trial 1 | Avg latency Trial 2 | Avg latency Trial 3 |
|------------|----------|---------------------|---------------------|---------------------|
| Y-C-7      | TsSAG    | 38.75               | 16                  | 25.25               |
| Y-C-11     | TsSAG    | 32.75               | 39.5                | 8.5                 |
| Y-C-12     | TsSAG    | 31.75               | 39                  | 47                  |
| Y-C-13     | TsSAG    | 38                  | 22.5                | 12.5                |
| Y-C-20     | TsSAG    | 32.5                | 21                  | 20                  |
| Y-C-21     | TsSAG    | 35.75               | 8                   | 5.25                |
| Y-C-36     | TsSAG    | 22.25               | 7.15                | 10.55               |
| Y-C-37     | TsSAG    | 17                  | 5.7                 | 16.25               |
| Y-C-38     | TsSAG    | 38.15               | 18.35               | 3.3                 |
| Y-C-41     | TsSAG    | 60                  | 27.45               | 58.6                |
| Y-C-45     | TsSAG    | 26.3                | 6.3                 | 5.3                 |
| Y-C-15     | TsVeh    | 27                  | 31.5                | 25.75               |
| Y-C-29     | TsVeh    | 32                  | 19                  | 58.75               |
| Y-C-33     | TsVeh    | 12.2                | 12.2                | 4.75                |
| Y-C-46     | TsVeh    | 22.55               | 8.6                 | 15.85               |
| Y-C-51     | TsVeh    | 37.65               | 35.35               | 12.15               |
| Y-C-52     | TsVeh    | 34.9                | 15.55               | 12.2                |
| Y-C-16     | EuVeh    | 20.5                | 12.5                | 14.25               |
| Y-C-17     | EuVeh    | 38.75               | 28                  | 22                  |
| Y-C-18     | EuVeh    | 60                  | 27                  | 29.5                |
| Y-C-19     | EuVeh    | 23.25               | 18                  | 8                   |
| Y-C-22     | EuVeh    | 45.5                | 30                  | 21.5                |
| Y-C-25     | EuVeh    | 33                  | 7.5                 | 18.75               |
| Y-C-26     | EuVeh    | 60                  | 14.75               | 25.25               |
| Y-C-27     | EuVeh    | 41.75               | 23.5                | 18.25               |
| Y-C-28     | EuVeh    | 47.25               | 19.75               | 16.25               |
| Y-C-32     | EuVeh    | 22.5                | 17                  | 18                  |
| Y-C-35     | EuVeh    | 21.95               | 22.25               | 22.25               |
| Y-C-47     | EuVeh    | 56.95               | 28.25               | 8.85                |
| Y-C-48     | EuVeh    | 12.1                | 16.3                | 8.95                |
| Y-C-49     | EuVeh    | 6.9                 | 9.25                | 3.5                 |
| Y-C-50     | EuVeh    | 14.6                | 7.95                | 25.85               |

**Table S8. Latency in the MWM hidden platform test (seconds).**

TsSAG (n=11), TsVeh (n=6) and EuVeh (n=15) over three training days and a total of 9 trials.

| Animal no. | Group ID | Day 1, Trial 1 latency (s) | Day 1, Trial 2 latency (s) | Day 1, Trial 3 latency (s) | Day 2, Trial 1 latency (s) | Day 2, Trial 2 latency (s) | Day 2, Trial 3 latency (s) | Day 3, Trial 1 latency (s) | Day 3, Trial 2 latency (s) | Day 3, Trial 3 latency (s) |
|------------|----------|----------------------------|----------------------------|----------------------------|----------------------------|----------------------------|----------------------------|----------------------------|----------------------------|----------------------------|
| Y-C-7      | TsSAG    | 14.75                      | 19.5                       | 9.25                       | 13.25                      | 13.5                       | 6.75                       | 11.5                       | 12                         | 15.75                      |
| Y-C-11     | TsSAG    | 39.75                      | 15.75                      | 14.25                      | 31.25                      | 47.75                      | 48.5                       | 23.75                      | 16.8                       | 15.75                      |
| Y-C-12     | TsSAG    | 47.5                       | 32.25                      | 46.25                      | 41                         | 45                         | 54.75                      | 47                         | 31.5                       | 43.75                      |
| Y-C-13     | TsSAG    | 29.5                       | 15.5                       | 16.75                      | 16.25                      | 12.5                       | 11.75                      | 11.75                      | 13                         | 11.25                      |
| Y-C-20     | TsSAG    | 25.25                      | 8.5                        | 9.75                       | 10.25                      | 12.25                      | 7.5                        | 11.25                      | 6.75                       | 8                          |
| Y-C-21     | TsSAG    | 17.5                       | 9.25                       | 18.75                      | 15.75                      | 14.5                       | 9.75                       | 13.5                       | 4.5                        | 10.25                      |
| Y-C-36     | TsSAG    | 32.05                      | 55.75                      | 28.55                      | 12.2                       | 51.9                       | 31                         | 37                         | 29.1                       | 36.55                      |
| Y-C-37     | TsSAG    | 60                         | 47.6                       | 32.9                       | 60.05                      | 44.05                      | 38.35                      | 26.65                      | 36.4                       | 25.95                      |
| Y-C-38     | TsSAG    | 29.75                      | 45.15                      | 13.45                      | 22.9                       | 26.75                      | 13.4                       | 29.45                      | 24.2                       | 22.7                       |
| Y-C-41     | TsSAG    | 8.35                       | 12.6                       | 25.25                      | 28.5                       | 5.35                       | 21                         | 12.6                       | 10.7                       | 21                         |
| Y-C-45     | TsSAG    | 48.45                      | 16.55                      | 44.3                       | 45.45                      | 33.15                      | 38.55                      | 50.55                      | 60.2                       | 44.4                       |
| Y-C-15     | TsVeh    | 50.75                      | 53.5                       | 31.5                       | 48.75                      | 40.5                       | 44.5                       | 27.5                       | 40.8                       | 37                         |
| Y-C-29     | TsVeh    | 58.5                       | 22.94                      | 46.25                      | 24                         | 35.25                      | 47.25                      | 51                         | 42.3                       | 33.25                      |
| Y-C-33     | TsVeh    | 45.2                       | 37.2                       | 41.95                      | 48.65                      | 37.15                      | 34.85                      | 54.2                       | 55.6                       | 60                         |
| Y-C-46     | TsVeh    | 43.65                      | 28.85                      | 12                         | 37.15                      | 33.85                      | 40.8                       | 39                         | 23.1                       | 18.25                      |
| Y-C-51     | TsVeh    | 30.85                      | 55.2                       | 53.65                      | 20                         | 38.9                       | 33.35                      | 31.05                      | 30.9                       | 50.55                      |
| Y-C-52     | TsVeh    | 52.25                      | 55.4                       | 38.45                      | 22.9                       | 35.7                       | 37.1                       | 33.9                       | 52.3                       | 29.95                      |
| Y-C-16     | EuVeh    | 17                         | 19.25                      | 15.25                      | 11                         | 12.25                      | 6.5                        | 6.25                       | 13.3                       | 3.25                       |
| Y-C-17     | EuVeh    | 32.5                       | 31.75                      | 29.5                       | 33.75                      | 23.75                      | 33.25                      | 22.5                       | 31.3                       | 19.5                       |
| Y-C-18     | EuVeh    | 41                         | 56                         | 24.25                      | 44.5                       | 41                         | 19.25                      | 21.5                       | 15.3                       | 7                          |
| Y-C-19     | EuVeh    | 12.5                       | 6.75                       | 8.25                       | 3.25                       | 11.25                      | 9.25                       | 8                          | 9                          | 7                          |
| Y-C-22     | EuVeh    | 39.25                      | 23.25                      | 11.5                       | 14.25                      | 8.5                        | 8.5                        | 16.25                      | 9.5                        | 11.5                       |
| Y-C-25     | EuVeh    | 32.75                      | 27.25                      | 13.5                       | 23.25                      | 18.75                      | 11.5                       | 11                         | 13.5                       | 14                         |
| Y-C-26     | EuVeh    | 40.75                      | 16                         | 19.75                      | 17                         | 21                         | 18.25                      | 13.25                      | 20.3                       | 8                          |
| Y-C-27     | EuVeh    | 24.5                       | 27                         | 29.5                       | 37.75                      | 17.25                      | 26                         | 15.5                       | 14.5                       | 21                         |
| Y-C-28     | EuVeh    | 31.25                      | 15.13                      | 25.805                     | 12                         | 24.75                      | 20.5                       | 33                         | 6                          | 18                         |
| Y-C-32     | EuVeh    | 58                         | 9                          | 21                         | 17.25                      | 11.5                       | 8                          | 12.5                       | 8.25                       | 6                          |
| Y-C-35     | EuVeh    | 33.5                       | 34.05                      | 22.15                      | 13.75                      | 15.8                       | 26.55                      | 6.25                       | 6.1                        | 13.28                      |
| Y-C-47     | EuVeh    | 8.5                        | 27.75                      | 8.75                       | 24.15                      | 25.35                      | 18.95                      | 9.8                        | 9.45                       | 14.75                      |
| Y-C-48     | EuVeh    | 43.65                      | 46.9                       | 32.6                       | 60                         | 52.4                       | 50.2                       | 44.55                      | 53.8                       | 50.45                      |
| Y-C-49     | EuVeh    | 31.55                      | 40.95                      | 14.65                      | 6.5                        | 15.9                       | 11.85                      | 20.4                       | 24.1                       | 8.05                       |
| Y-C-50     | EuVeh    | 42.05                      | 32.55                      | 12.7                       | 15.1                       | 31.15                      | 37.67                      | 13.7                       | 12.3                       | 26.3                       |

**Table S9. Time spent in the correct quadrant in the MWM probe test (seconds).**  
TsSAG (n=11), TsVeh (n=6) and EuVeh (n=15).

| Animal no. | Group ID | % time in correct quadrant |
|------------|----------|----------------------------|
| Y-C-7      | TsSAG    | 42.17                      |
| Y-C-11     | TsSAG    | 34.50                      |
| Y-C-12     | TsSAG    | 51.17                      |
| Y-C-13     | TsSAG    | 51.50                      |
| Y-C-20     | TsSAG    | 66.33                      |
| Y-C-21     | TsSAG    | 45.28                      |
| Y-C-36     | TsSAG    | 27.33                      |
| Y-C-37     | TsSAG    | 30.00                      |
| Y-C-38     | TsSAG    | 33.22                      |
| Y-C-41     | TsSAG    | 54.56                      |
| Y-C-45     | TsSAG    | 26.78                      |
| Y-C-15     | TsVeh    | 26.56                      |
| Y-C-29     | TsVeh    | 23.89                      |
| Y-C-33     | TsVeh    | 23.33                      |
| Y-C-46     | TsVeh    | 23.61                      |
| Y-C-51     | TsVeh    | 22.22                      |
| Y-C-52     | TsVeh    | 26.44                      |
| Y-C-16     | EuVeh    | 50.22                      |
| Y-C-17     | EuVeh    | 29.11                      |
| Y-C-18     | EuVeh    | 27.72                      |
| Y-C-19     | EuVeh    | 48.11                      |
| Y-C-22     | EuVeh    | 48.17                      |
| Y-C-25     | EuVeh    | 44.83                      |
| Y-C-26     | EuVeh    | 31.28                      |
| Y-C-27     | EuVeh    | 36.28                      |
| Y-C-28     | EuVeh    | 42.78                      |
| Y-C-32     | EuVeh    | 42.33                      |
| Y-C-35     | EuVeh    | 45.50                      |
| Y-C-47     | EuVeh    | 48.44                      |
| Y-C-48     | EuVeh    | 34.06                      |
| Y-C-49     | EuVeh    | 44.11                      |
| Y-C-50     | EuVeh    | 32.89                      |

**Table S10. Strategy scores of animals in hidden platform test, by day and trial no.**

Three trials were conducted every day for three consecutive days and each trial was composed of four attempts. All the attempts in each trial over the three days were scored for every animal.

| Group ID | Animal no. | Day1 Trial | Score attempt 1 | Score attempt 2 | Score attempt 3 | Score attempt 4 | Day 2 Trial | Score attempt 1 | Score attempt 2 | Score attempt 3 | Score attempt 4 | Day 3 Trial |
|----------|------------|------------|-----------------|-----------------|-----------------|-----------------|-------------|-----------------|-----------------|-----------------|-----------------|-------------|
| TsVeh    | 15         | 1          | 3               | 10              | 9               | 7               | 1           | 3               | 4               | 9               | 10              | 1           |
| TsVeh    | 15         | 2          | 11              | 9               | 4               | 9               | 2           | 9               | 9               | 2               | 4               | 2           |
| TsVeh    | 15         | 3          | 4               | 2               | 3               | 10              | 3           | 5               | 9               | 9               | 1               | 3           |
| TsVeh    | 29         | 1          | 8               | 10              | 9               | 10              | 1           | 9               | 2               | 4               | 1               | 1           |
| TsVeh    | 29         | 2          | 3               | 2               | 1               | 9               | 2           | 9               | 2               | 1               | 4               | 2           |
| TsVeh    | 29         | 3          | 9               | 9               | 8               | 4               | 3           | 9               | 7               | 9               | 2               | 3           |
| TsVeh    | 33         | 1          | 10              | 10              | 9               | 1               | 1           | 8               | 10              | 10              | 5               | 1           |
| TsVeh    | 33         | 2          | 6               | 8               | 8               | 6               | 2           | 8               | 8               | 1               | 8               | 2           |
| TsVeh    | 33         | 3          | 8               | 9               | 1               | 9               | 3           | 6               | 2               | 3               | 7               | 3           |
| TsVeh    | 46         | 1          | 8               | 5               | 9               | 8               | 1           | 8               | 3               | 9               | 8               | 1           |
| TsVeh    | 46         | 2          | 9               | 6               | 2               | 8               | 2           | 9               | 6               | 7               | 5               | 2           |
| TsVeh    | 46         | 3          | 2               | 5               | 2               | 6               | 3           | 2               | 9               | 9               | 6               | 3           |
| TsSAG    | 13         | 1          | 7               | 5               | 6               | 2               | 1           | 3               | 1               | 4               | 2               | 1           |
| TsSAG    | 13         | 2          | 2               | 4               | 3               | 5               | 2           | 2               | 2               | 2               | 3               | 2           |
| TsSAG    | 13         | 3          | 3               | 6               | 5               | 3               | 3           | 1               | 2               | 2               | 1               | 3           |
| TsSAG    | 11         | 1          | 6               | 7               | 4               | 9               | 1           | 7               | 1               | 9               | 6               | 1           |
| TsSAG    | 11         | 2          | 4               | 2               | 3               | 2               | 2           | 11              | 9               | 2               | 9               | 2           |
| TsSAG    | 11         | 3          | 3               | 1               | 6               | 4               | 3           | 7               | 3               | 7               | 9               | 3           |
| TsSAG    | 12         | 1          | 9               | 9               | 9               | 2               | 1           | 11              | 2               | 9               | 4               | 1           |
| TsSAG    | 12         | 2          | 3               | 11              | 1               | 4               | 2           | 7               | 8               | 2               | 10              | 2           |
| TsSAG    | 12         | 3          | 10              | 2               | 3               | 10              | 3           | 9               | 6               | 11              | 11              | 3           |
| TsSAG    | 20         | 1          | 5               | 7               | 5               | 6               | 1           | 2               | 2               | 5               | 2               | 1           |
| TsSAG    | 20         | 2          | 6               | 3               | 3               | 2               | 2           | 2               | 5               | 1               | 2               | 2           |
| TsSAG    | 20         | 3          | 2               | 5               | 3               | 5               | 3           | 2               | 2               | 1               | 2               | 3           |
| TsSAG    | 7          | 1          | 8               | 2               | 5               | 6               | 1           | 4               | 5               | 2               | 2               | 1           |
| TsSAG    | 7          | 2          | 3               | 6               | 6               | 7               | 2           | 7               | 5               | 3               | 2               | 2           |
| TsSAG    | 7          | 3          | 2               | 5               | 3               | 2               | 3           | 1               | 2               | 3               | 2               | 3           |
| TsSAG    | 21         | 1          | 1               | 7               | 5               | 8               | 1           | 5               | 5               | 4               | 5               | 1           |
| TsSAG    | 21         | 2          | 1               | 4               | 4               | 2               | 2           | 4               | 2               | 3               | 8               | 2           |
| TsSAG    | 21         | 3          | 2               | 5               | 3               | 7               | 3           | 5               | 2               | 5               | 2               | 3           |
| TsSAG    | 36         | 1          | 1               | 7               | 7               | 9               | 1           | 1               | 6               | 3               | 2               | 1           |
| TsSAG    | 36         | 2          | 9               | 9               | 9               | 7               | 2           | 9               | 9               | 9               | 5               | 2           |
| TsSAG    | 36         | 3          | 8               | 4               | 7               | 7               | 3           | 4               | 7               | 1               | 6               | 3           |
| TsSAG    | 37         | 1          | 8               | 10              | 7               | 7               | 1           | 9               | 9               | 7               | 7               | 1           |
| TsSAG    | 37         | 2          | 9               | 5               | 9               | 9               | 2           | 5               | 9               | 3               | 8               | 2           |
| TsSAG    | 37         | 3          | 9               | 4               | 6               | 9               | 3           | 7               | 7               | 8               | 3               | 3           |
| TsSAG    | 38         | 1          | 1               | 8               | 3               | 9               | 1           | 7               | 3               | 3               | 7               | 1           |
| TsSAG    | 38         | 2          | 9               | 9               | 1               | 9               | 2           | 5               | 7               | 10              | 1               | 2           |
| TsSAG    | 38         | 3          | 2               | 6               | 7               | 1               | 3           | 3               | 6               | 1               | 5               | 3           |
| TsSAG    | 45         | 1          | 10              | 10              | 9               | 5               | 1           | 10              | 9               | 2               | 7               | 1           |

|       |    |   |    |    |    |   |   |    |    |   |    |   |
|-------|----|---|----|----|----|---|---|----|----|---|----|---|
| TsSAG | 45 | 2 | 5  | 4  | 1  | 4 | 2 | 2  | 9  | 6 | 1  | 2 |
| TsSAG | 45 | 3 | 10 | 9  | 7  | 1 | 3 | 3  | 7  | 9 | 3  | 3 |
| TsSAG | 41 | 1 | 2  | 3  | 2  | 2 | 1 | 7  | 7  | 1 | 7  | 1 |
| TsSAG | 41 | 2 | 4  | 4  | 2  | 3 | 2 | 3  | 5  | 1 | 2  | 2 |
| TsSAG | 41 | 3 | 9  | 3  | 2  | 5 | 3 | 5  | 4  | 7 | 5  | 3 |
| EuVeh | 16 | 1 | 3  | 7  | 7  | 1 | 1 | 4  | 1  | 2 | 5  | 1 |
| EuVeh | 16 | 2 | 4  | 3  | 2  | 7 | 2 | 5  | 1  | 1 | 3  | 2 |
| EuVeh | 16 | 3 | 8  | 3  | 3  | 2 | 3 | 1  | 2  | 2 | 2  | 3 |
| EuVeh | 19 | 1 | 2  | 4  | 8  | 5 | 1 | 1  | 1  | 2 | 2  | 1 |
| EuVeh | 19 | 2 | 2  | 3  | 4  | 3 | 2 | 5  | 3  | 2 | 5  | 2 |
| EuVeh | 19 | 3 | 2  | 6  | 1  | 4 | 3 | 3  | 3  | 2 | 1  | 3 |
| EuVeh | 32 | 1 | 9  | 7  | 9  | 9 | 1 | 7  | 4  | 2 | 5  | 1 |
| EuVeh | 32 | 2 | 2  | 5  | 4  | 2 | 2 | 8  | 2  | 3 | 5  | 2 |
| EuVeh | 32 | 3 | 5  | 7  | 2  | 6 | 3 | 1  | 1  | 3 | 4  | 3 |
| EuVeh | 18 | 1 | 5  | 2  | 10 | 9 | 1 | 3  | 4  | 9 | 10 | 1 |
| EuVeh | 18 | 2 | 7  | 9  | 9  | 9 | 2 | 4  | 9  | 9 | 2  | 2 |
| EuVeh | 18 | 3 | 2  | 9  | 3  | 1 | 3 | 1  | 2  | 5 | 2  | 3 |
| EuVeh | 27 | 1 | 7  | 4  | 1  | 6 | 1 | 7  | 8  | 1 | 5  | 1 |
| EuVeh | 27 | 2 | 2  | 1  | 5  | 7 | 2 | 1  | 6  | 1 | 8  | 2 |
| EuVeh | 27 | 3 | 7  | 5  | 5  | 8 | 3 | 5  | 4  | 8 | 4  | 3 |
| EuVeh | 25 | 1 | 9  | 5  | 6  | 4 | 1 | 7  | 8  | 1 | 6  | 1 |
| EuVeh | 25 | 2 | 3  | 4  | 7  | 4 | 2 | 1  | 1  | 3 | 9  | 2 |
| EuVeh | 25 | 3 | 1  | 6  | 8  | 6 | 3 | 5  | 2  | 5 | 3  | 3 |
| EuVeh | 28 | 1 | 7  | 7  | 1  | 1 | 1 | 5  | 2  | 8 | 2  | 1 |
| EuVeh | 28 | 2 | 5  | 1  | 5  | 3 | 2 | 8  | 2  | 2 | 10 | 2 |
| EuVeh | 28 | 3 | 3  | 2  | 7  | 4 | 3 | 2  | 8  | 3 | 8  | 3 |
| EuVeh | 26 | 1 | 7  | 7  | 7  | 1 | 1 | 4  | 5  | 1 | 8  | 1 |
| EuVeh | 26 | 2 | 6  | 1  | 3  | 4 | 2 | 1  | 7  | 5 | 8  | 2 |
| EuVeh | 26 | 3 | 5  | 3  | 1  | 5 | 3 | 7  | 3  | 1 | 5  | 3 |
| EuVeh | 35 | 1 | 4  | 7  | 5  | 9 | 1 | 6  | 3  | 6 | 1  | 1 |
| EuVeh | 35 | 2 | 9  | 1  | 6  | 9 | 2 | 8  | 2  | 8 | 3  | 2 |
| EuVeh | 35 | 3 | 6  | 5  | 6  | 3 | 3 | 9  | 6  | 5 | 3  | 3 |
| EuVeh | 47 | 1 | 5  | 2  | 5  | 6 | 1 | 3  | 5  | 6 | 7  | 1 |
| EuVeh | 47 | 2 | 9  | 1  | 2  | 7 | 2 | 4  | 6  | 1 | 6  | 2 |
| EuVeh | 47 | 3 | 6  | 3  | 2  | 1 | 3 | 7  | 3  | 1 | 4  | 3 |
| EuVeh | 48 | 1 | 2  | 10 | 9  | 7 | 1 | 9  | 11 | 9 | 10 | 1 |
| EuVeh | 48 | 2 | 5  | 9  | 9  | 5 | 2 | 9  | 7  | 4 | 7  | 2 |
| EuVeh | 48 | 3 | 9  | 7  | 3  | 2 | 3 | 3  | 7  | 6 | 10 | 3 |
| EuVeh | 49 | 1 | 9  | 3  | 7  | 1 | 1 | 4  | 3  | 3 | 1  | 1 |
| EuVeh | 49 | 2 | 9  | 1  | 9  | 7 | 2 | 3  | 6  | 1 | 2  | 2 |
| EuVeh | 49 | 3 | 4  | 6  | 1  | 6 | 3 | 4  | 1  | 5 | 2  | 3 |
| EuVeh | 50 | 1 | 6  | 9  | 7  | 4 | 1 | 2  | 5  | 7 | 6  | 1 |
| EuVeh | 50 | 2 | 6  | 7  | 3  | 7 | 2 | 10 | 8  | 2 | 7  | 2 |
| EuVeh | 50 | 3 | 5  | 3  | 2  | 5 | 3 | 3  | 6  | 8 | 8  | 3 |

**Table S11. Relationship between fiber volley (FV) amplitude and fEPSP slope.**

Input-output curve

| EuVeh    |                       |       |       |       |       |          |                      |       |       |       |       |
|----------|-----------------------|-------|-------|-------|-------|----------|----------------------|-------|-------|-------|-------|
| cell     | FV amplitude (X-axis) |       |       |       |       | cell     | fEPSP slope (Y-axis) |       |       |       |       |
| #1       | 0.187                 | 0.288 | 0.383 | 0.496 | 0.589 | #1       | 0.621                | 0.804 | 1.010 | 1.247 | 1.411 |
| #2       | 0.207                 | 0.307 | 0.406 | 0.489 | 0.630 | #2       | 0.614                | 0.777 | 0.953 | 1.082 | 1.230 |
| #3       | 0.198                 | 0.269 | 0.403 | 0.492 | 0.599 | #3       | 0.649                | 0.843 | 1.090 | 1.269 | 1.400 |
| #4       | 0.192                 | 0.280 | 0.398 | 0.494 | 0.600 | #4       | 0.695                | 0.819 | 1.059 | 1.183 | 1.402 |
| #5       | 0.199                 | 0.308 | 0.406 | 0.508 | 0.603 | #5       | 0.569                | 0.781 | 0.916 | 1.109 | 1.214 |
| #6       | 0.222                 | 0.312 | 0.424 | 0.503 | 0.605 | #6       | 0.554                | 0.738 | 0.945 | 1.128 | 1.346 |
| #7       | 0.230                 | 0.312 | 0.396 | 0.507 | 0.613 | #7       | 0.534                | 0.693 | 0.854 | 1.002 | 1.259 |
| #8       | 0.229                 | 0.320 | 0.391 | 0.517 | 0.585 | #8       | 0.608                | 0.800 | 0.996 | 1.231 | 1.359 |
| #9       | 0.209                 | 0.305 | 0.393 | 0.503 | 0.593 | #9       | 0.612                | 0.787 | 0.964 | 1.167 | 1.257 |
| #10      | 0.215                 | 0.302 | 0.399 | 0.497 | 0.597 | #10      | 0.628                | 0.750 | 0.977 | 1.225 | 1.452 |
| #11      | 0.198                 | 0.305 | 0.401 | 0.490 | 0.600 | #11      | 0.592                | 0.790 | 1.002 | 1.240 | 1.447 |
| #12      | 0.233                 | 0.301 | 0.388 | 0.477 | 0.580 | #12      | 0.835                | 0.794 | 0.980 | 1.252 | 1.426 |
| #13      | 0.223                 | 0.284 | 0.381 | 0.504 | 0.576 | #13      | 0.641                | 0.782 | 1.024 | 1.308 | 1.395 |
| #14      | 0.216                 | 0.308 | 0.382 | 0.481 | 0.594 | #14      | 0.557                | 0.781 | 0.992 | 1.232 | 1.400 |
| mean (X) | 0.211                 | 0.300 | 0.397 | 0.497 | 0.598 | mean (Y) | 0.622                | 0.781 | 0.983 | 1.191 | 1.357 |
| SEM      | 0.004                 | 0.004 | 0.003 | 0.003 | 0.004 | SEM      | 0.020                | 0.010 | 0.016 | 0.023 | 0.022 |
| n        | 14                    | 14    | 14    | 14    | 14    | n        | 14                   | 14    | 14    | 14    | 14    |

| TsVeh |                       |       |       |       |       |      |                      |       |       |       |       |
|-------|-----------------------|-------|-------|-------|-------|------|----------------------|-------|-------|-------|-------|
| cell  | FV amplitude (X-axis) |       |       |       |       | cell | fEPSP slope (Y-axis) |       |       |       |       |
| #1    | 0.218                 | 0.302 | 0.393 | 0.489 | 0.621 | #1   | 0.687                | 0.795 | 1.004 | 1.220 | 1.422 |
| #2    | 0.215                 | 0.298 | 0.385 | 0.483 | 0.595 | #2   | 0.655                | 0.825 | 1.027 | 1.275 | 1.464 |
| #3    | 0.223                 | 0.297 | 0.381 | 0.501 | 0.576 | #3   | 0.630                | 0.794 | 1.007 | 1.276 | 1.365 |
| #4    | 0.197                 | 0.309 | 0.408 | 0.515 | 0.617 | #4   | 0.581                | 0.798 | 0.960 | 1.186 | 1.327 |
| #5    | 0.212                 | 0.307 | 0.420 | 0.514 | 0.590 | #5   | 0.614                | 0.799 | 0.928 | 1.159 | 1.370 |
| #6    | 0.215                 | 0.292 | 0.408 | 0.507 | 0.594 | #6   | 0.608                | 0.762 | 0.933 | 1.169 | 1.355 |

|          |       |       |       |       |       |          |       |       |       |       |       |
|----------|-------|-------|-------|-------|-------|----------|-------|-------|-------|-------|-------|
| #7       | 0.192 | 0.297 | 0.425 | 0.516 | 0.606 | #7       | 0.611 | 0.751 | 0.952 | 1.148 | 1.330 |
| #8       | 0.204 | 0.300 | 0.397 | 0.507 | 0.609 | #8       | 0.597 | 0.764 | 0.901 | 1.171 | 1.338 |
| #9       | 0.205 | 0.295 | 0.407 | 0.499 | 0.599 | #9       | 0.584 | 0.750 | 0.907 | 1.148 | 1.346 |
| #10      | 0.198 | 0.301 | 0.407 | 0.502 | 0.617 | #10      | 0.580 | 0.718 | 0.951 | 1.155 | 1.326 |
| #11      | 0.215 | 0.267 | 0.386 | 0.503 | 0.600 | #11      | 0.643 | 0.775 | 1.097 | 1.255 | 1.329 |
| #12      | 0.202 | 0.283 | 0.381 | 0.505 | 0.634 | #12      | 0.609 | 0.748 | 1.023 | 1.168 | 1.371 |
| #13      | 0.215 | 0.299 | 0.416 | 0.506 | 0.607 | #13      | 0.608 | 0.766 | 0.998 | 1.156 | 1.309 |
| #14      | 0.211 | 0.297 | 0.404 | 0.514 | 0.607 | #14      | 0.619 | 0.777 | 0.995 | 1.212 | 1.368 |
| #15      | 0.198 | 0.292 | 0.398 | 0.523 | 0.605 | #15      | 0.652 | 0.803 | 0.929 | 1.230 | 1.334 |
| #16      | 0.190 | 0.289 | 0.378 | 0.513 | 0.604 | #16      | 0.699 | 0.927 | 1.061 | 1.243 | 1.338 |
| #17      | 0.207 | 0.287 | 0.406 | 0.496 | 0.610 | #17      | 0.675 | 0.845 | 1.066 | 1.226 | 1.403 |
| #18      | 0.200 | 0.296 | 0.386 | 0.501 | 0.580 | #18      | 0.588 | 0.832 | 1.023 | 1.242 | 1.394 |
| #19      | 0.208 | 0.298 | 0.381 | 0.503 | 0.587 | #19      | 0.690 | 0.861 | 0.993 | 1.245 | 1.384 |
| #20      | 0.198 | 0.289 | 0.389 | 0.513 | 0.588 | #20      | 0.616 | 0.847 | 1.073 | 1.359 | 1.415 |
| #21      | 0.202 | 0.295 | 0.391 | 0.486 | 0.593 | #21      | 0.659 | 0.842 | 1.028 | 1.223 | 1.443 |
| #22      | 0.213 | 0.282 | 0.398 | 0.493 | 0.600 | #22      | 0.624 | 0.736 | 1.012 | 1.298 | 1.377 |
| #23      | 0.206 | 0.291 | 0.399 | 0.493 | 0.587 | #23      | 0.601 | 0.850 | 1.094 | 1.288 | 1.453 |
| #24      | 0.223 | 0.304 | 0.395 | 0.499 | 0.618 | #24      | 0.661 | 0.855 | 0.985 | 1.201 | 1.441 |
| mean (X) | 0.207 | 0.294 | 0.397 | 0.503 | 0.602 | mean (Y) | 0.629 | 0.801 | 0.998 | 1.219 | 1.375 |
| SEM      | 0.002 | 0.002 | 0.003 | 0.002 | 0.003 | SEM      | 0.007 | 0.010 | 0.012 | 0.011 | 0.009 |
| n        | 24    | 24    | 24    | 24    | 24    | n        | 24    | 24    | 24    | 24    | 24    |

| TsSAG |                       |       |       |       |       |      |                      |       |       |       |       |
|-------|-----------------------|-------|-------|-------|-------|------|----------------------|-------|-------|-------|-------|
| cell  | FV amplitude (X-axis) |       |       |       |       | cell | fEPSP slope (Y-axis) |       |       |       |       |
| #1    | 0.193                 | 0.285 | 0.388 | 0.499 | 0.575 | #1   | 0.691                | 0.839 | 1.027 | 1.207 | 1.349 |
| #2    | 0.193                 | 0.289 | 0.383 | 0.493 | 0.607 | #2   | 0.699                | 0.785 | 1.007 | 1.178 | 1.282 |
| #3    | 0.210                 | 0.307 | 0.402 | 0.504 | 0.614 | #3   | 0.661                | 0.769 | 0.972 | 1.150 | 1.274 |
| #4    | 0.196                 | 0.280 | 0.371 | 0.474 | 0.591 | #4   | 0.692                | 0.799 | 1.053 | 1.395 | 1.646 |
| #5    | 0.204                 | 0.280 | 0.400 | 0.496 | 0.608 | #5   | 0.698                | 0.731 | 0.997 | 1.246 | 1.387 |
| #6    | 0.190                 | 0.306 | 0.394 | 0.470 | 0.570 | #6   | 0.682                | 0.815 | 1.032 | 1.237 | 1.542 |
| #7    | 0.208                 | 0.268 | 0.398 | 0.513 | 0.587 | #7   | 0.666                | 0.764 | 1.022 | 1.237 | 1.360 |

|             |       |       |       |       |       |             |       |       |       |       |       |
|-------------|-------|-------|-------|-------|-------|-------------|-------|-------|-------|-------|-------|
| #8          | 0.189 | 0.289 | 0.388 | 0.520 | 0.588 | #8          | 0.611 | 0.782 | 0.977 | 1.238 | 1.399 |
| #9          | 0.224 | 0.284 | 0.409 | 0.504 | 0.594 | #9          | 0.632 | 0.718 | 0.971 | 1.132 | 1.163 |
| mean<br>(X) | 0.201 | 0.288 | 0.392 | 0.497 | 0.593 | mean<br>(Y) | 0.670 | 0.778 | 1.007 | 1.225 | 1.378 |
| SEM         | 0.004 | 0.004 | 0.004 | 0.006 | 0.005 | SEM         | 0.010 | 0.013 | 0.010 | 0.025 | 0.048 |
| n           | 9     | 9     | 9     | 9     | 9     | n           | 9     | 9     | 9     | 9     | 9     |

**Table S12. Paired Pulse Ratio.**

| EuVeh         |       |       |       |       |       |
|---------------|-------|-------|-------|-------|-------|
| interval (ms) | 30    | 60    | 90    | 120   | 150   |
| #1            | 1.261 | 1.300 | 1.215 | 1.171 | 1.142 |
| #2            | 1.276 | 1.285 | 1.210 | 1.196 | 1.143 |
| #3            | 1.286 | 1.284 | 1.219 | 1.165 | 1.132 |
| #4            | 1.308 | 1.303 | 1.218 | 1.194 | 1.152 |
| #5            | 1.224 | 1.332 | 1.246 | 1.163 | 1.121 |
| #6            | 1.285 | 1.295 | 1.207 | 1.188 | 1.145 |
| #7            | 1.243 | 1.280 | 1.261 | 1.158 | 1.150 |
| #8            | 1.296 | 1.303 | 1.236 | 1.195 | 1.135 |
| #9            | 1.277 | 1.328 | 1.226 | 1.196 | 1.166 |
| #10           | 1.269 | 1.313 | 1.220 | 1.183 | 1.148 |
| #11           | 1.265 | 1.328 | 1.242 | 1.218 | 1.171 |
| #12           | 1.287 | 1.304 | 1.205 | 1.172 | 1.150 |
| #13           | 1.278 | 1.305 | 1.211 | 1.144 | 1.124 |
| #14           | 1.284 | 1.334 | 1.206 | 1.122 | 1.076 |
| mean          | 1.274 | 1.307 | 1.223 | 1.176 | 1.140 |
| SEM           | 0.006 | 0.005 | 0.005 | 0.007 | 0.006 |
| n             | 14    | 14    | 14    | 14    | 14    |

| TsVeh         |       |       |       |       |       |
|---------------|-------|-------|-------|-------|-------|
| interval (ms) | 30    | 60    | 90    | 120   | 150   |
| #1            | 1.315 | 1.358 | 1.317 | 1.232 | 1.180 |
| #2            | 1.314 | 1.337 | 1.303 | 1.203 | 1.147 |



|      |       |       |       |       |       |
|------|-------|-------|-------|-------|-------|
| #3   | 1.286 | 1.282 | 1.251 | 1.154 | 1.150 |
| #4   | 1.317 | 1.350 | 1.278 | 1.219 | 1.193 |
| #5   | 1.315 | 1.337 | 1.260 | 1.226 | 1.195 |
| #6   | 1.298 | 1.340 | 1.272 | 1.224 | 1.191 |
| #7   | 1.311 | 1.327 | 1.250 | 1.228 | 1.190 |
| #8   | 1.272 | 1.305 | 1.233 | 1.162 | 1.096 |
| #9   | 1.253 | 1.309 | 1.168 | 1.133 | 1.092 |
| #10  | 1.236 | 1.291 | 1.185 | 1.168 | 1.093 |
| #11  | 1.264 | 1.293 | 1.231 | 1.158 | 1.093 |
| #12  | 1.253 | 1.284 | 1.179 | 1.155 | 1.096 |
| #13  | 1.244 | 1.266 | 1.147 | 1.122 | 1.082 |
| #14  | 1.233 | 1.276 | 1.153 | 1.121 | 1.099 |
| #15  | 1.259 | 1.248 | 1.173 | 1.127 | 1.080 |
| #16  | 1.263 | 1.255 | 1.183 | 1.131 | 1.081 |
| #17  | 1.288 | 1.265 | 1.207 | 1.135 | 1.071 |
| #18  | 1.288 | 1.288 | 1.267 | 1.148 | 1.147 |
| mean | 1.278 | 1.301 | 1.225 | 1.169 | 1.126 |
| SEM  | 0.007 | 0.008 | 0.012 | 0.010 | 0.011 |
| n    | 18    | 18    | 18    | 18    | 18    |

| TsSAG         |      |      |      |      |      |
|---------------|------|------|------|------|------|
| interval (ms) | 30   | 60   | 90   | 120  | 150  |
| #1            | 1.26 | 1.31 | 1.12 | 1.14 | 1.11 |
| #2            | 1.27 | 1.29 | 1.20 | 1.16 | 1.10 |
| #3            | 1.27 | 1.39 | 1.28 | 1.23 | 1.14 |
| #4            | 1.27 | 1.46 | 1.28 | 1.20 | 1.11 |
| #5            | 1.25 | 1.24 | 1.23 | 1.15 | 1.12 |
| #6            | 1.26 | 1.25 | 1.21 | 1.18 | 1.12 |
| #7            | 1.26 | 1.27 | 1.23 | 1.17 | 1.14 |
| #8            | 1.27 | 1.25 | 1.20 | 1.16 | 1.14 |
| #9            | 1.27 | 1.26 | 1.21 | 1.16 | 1.13 |
| #10           | 1.27 | 1.25 | 1.22 | 1.15 | 1.14 |
| #11           | 1.26 | 1.25 | 1.20 | 1.16 | 1.13 |

|      |      |      |      |      |      |
|------|------|------|------|------|------|
| mean | 1.27 | 1.29 | 1.22 | 1.17 | 1.12 |
| SEM  | 0.00 | 0.02 | 0.01 | 0.01 | 0.00 |
| n    | 11   | 11   | 11   | 11   | 11   |

**Table S13. TBS-LTP enhanced by SAG in slices from Ts65Dn mice.**

| EuVeh     |         |         |         |         |         |         |         |         |         |         |         |         |         |       |    |
|-----------|---------|---------|---------|---------|---------|---------|---------|---------|---------|---------|---------|---------|---------|-------|----|
| time(min) | #1      | #2      | #3      | #4      | #5      | #6      | #7      | #8      | #9      | #10     | #11     | #12     | mean    | SEM   | n  |
| -28       | 94.249  | 96.703  | 100.039 | 102.111 | 101.025 | 98.076  | 93.891  | 94.574  | 98.180  | 98.025  | 97.697  | 94.125  | 97.391  | 0.804 | 12 |
| -26       | 93.987  | 97.904  | 102.038 | 103.319 | 102.488 | 97.030  | 97.996  | 99.373  | 98.279  | 100.156 | 98.115  | 94.715  | 98.783  | 0.834 | 12 |
| -24       | 97.046  | 100.376 | 100.454 | 100.449 | 100.594 | 96.517  | 98.240  | 94.537  | 100.277 | 103.162 | 96.651  | 96.588  | 98.741  | 0.721 | 12 |
| -22       | 99.179  | 98.426  | 99.093  | 99.040  | 96.529  | 98.320  | 96.561  | 98.772  | 97.674  | 99.236  | 97.551  | 98.215  | 98.216  | 0.277 | 12 |
| -20       | 98.192  | 101.280 | 99.145  | 97.001  | 99.072  | 100.697 | 100.714 | 94.985  | 98.112  | 100.954 | 101.647 | 99.109  | 99.242  | 0.569 | 12 |
| -18       | 100.647 | 102.249 | 97.158  | 98.492  | 102.019 | 98.899  | 103.417 | 96.875  | 100.133 | 99.174  | 99.294  | 100.251 | 99.884  | 0.575 | 12 |
| -16       | 98.131  | 102.768 | 100.575 | 100.943 | 98.817  | 102.195 | 99.000  | 102.750 | 101.377 | 101.367 | 99.653  | 100.534 | 100.676 | 0.443 | 12 |
| -14       | 99.525  | 102.795 | 98.609  | 100.220 | 99.235  | 101.726 | 99.094  | 100.363 | 100.724 | 98.999  | 100.883 | 100.545 | 100.226 | 0.354 | 12 |
| -12       | 97.833  | 102.122 | 101.423 | 98.082  | 99.358  | 99.328  | 103.497 | 103.316 | 99.698  | 99.254  | 104.006 | 102.207 | 100.844 | 0.628 | 12 |
| -10       | 100.529 | 101.024 | 103.589 | 100.237 | 101.287 | 100.910 | 101.584 | 102.062 | 103.888 | 100.283 | 101.207 | 103.200 | 101.650 | 0.367 | 12 |
| -8        | 103.335 | 97.262  | 100.497 | 99.619  | 99.334  | 103.954 | 101.073 | 105.199 | 100.251 | 100.379 | 101.514 | 102.044 | 101.205 | 0.631 | 12 |
| -6        | 105.160 | 97.919  | 99.674  | 100.672 | 100.655 | 101.277 | 101.364 | 102.620 | 99.271  | 100.036 | 101.447 | 102.413 | 101.042 | 0.535 | 12 |
| -4        | 103.571 | 100.098 | 97.894  | 100.354 | 101.518 | 100.306 | 104.136 | 102.096 | 100.482 | 99.935  | 100.578 | 100.776 | 100.979 | 0.484 | 12 |
| -2        | 105.406 | 100.757 | 99.713  | 100.569 | 98.572  | 100.181 | 99.577  | 101.476 | 102.279 | 100.298 | 101.467 | 103.425 | 101.143 | 0.537 | 12 |
| 0         | 105.996 | 98.671  | 99.678  | 98.892  | 98.775  | 100.583 | 99.856  | 99.345  | 99.374  | 100.303 | 99.528  | 100.383 | 100.115 | 0.564 | 12 |
| 2         | 226.435 | 180.040 | 187.383 | 165.648 | 170.245 | 168.803 | 199.625 | 160.062 | 201.699 | 187.593 | 170.317 | 191.073 | 184.077 | 5.481 | 12 |
| 4         | 207.245 | 169.090 | 178.325 | 154.938 | 150.917 | 159.739 | 180.601 | 155.846 | 181.087 | 179.171 | 157.133 | 171.210 | 170.442 | 4.637 | 12 |
| 6         | 193.510 | 156.613 | 164.630 | 146.222 | 141.751 | 151.383 | 177.109 | 142.725 | 170.467 | 172.489 | 148.964 | 156.607 | 160.206 | 4.558 | 12 |
| 8         | 182.747 | 150.587 | 158.756 | 142.152 | 133.734 | 143.605 | 174.362 | 140.819 | 165.166 | 162.902 | 143.625 | 151.066 | 154.127 | 4.289 | 12 |
| 10        | 176.288 | 147.204 | 156.681 | 136.403 | 129.350 | 143.454 | 169.334 | 136.894 | 158.114 | 158.498 | 142.532 | 146.101 | 150.071 | 4.038 | 12 |
| 12        | 169.609 | 142.322 | 156.525 | 135.295 | 127.978 | 145.337 | 167.001 | 132.797 | 152.839 | 154.262 | 137.793 | 143.756 | 147.126 | 3.803 | 12 |
| 14        | 166.619 | 138.927 | 149.539 | 135.169 | 124.092 | 148.161 | 165.400 | 136.020 | 152.543 | 152.094 | 140.602 | 141.945 | 145.926 | 3.579 | 12 |
| 16        | 164.904 | 138.309 | 147.717 | 132.990 | 126.179 | 138.900 | 171.807 | 131.424 | 152.112 | 149.467 | 139.444 | 139.738 | 144.416 | 3.904 | 12 |
| 18        | 161.908 | 135.810 | 146.843 | 133.804 | 120.624 | 139.020 | 167.006 | 135.327 | 150.643 | 146.986 | 135.852 | 138.450 | 142.689 | 3.698 | 12 |
| 20        | 159.674 | 133.149 | 143.662 | 130.400 | 120.892 | 136.025 | 163.335 | 138.070 | 147.146 | 144.758 | 136.462 | 137.934 | 140.959 | 3.425 | 12 |
| 22        | 161.272 | 133.660 | 143.184 | 131.458 | 121.490 | 134.256 | 166.697 | 136.114 | 145.984 | 146.270 | 136.340 | 136.529 | 141.105 | 3.657 | 12 |
| 24        | 157.205 | 133.622 | 140.268 | 128.349 | 122.802 | 137.438 | 169.717 | 132.007 | 146.757 | 146.366 | 136.206 | 140.640 | 140.948 | 3.705 | 12 |
| 26        | 159.898 | 134.008 | 139.677 | 130.622 | 117.715 | 137.506 | 167.236 | 136.300 | 144.701 | 142.059 | 134.969 | 134.286 | 139.915 | 3.756 | 12 |

|    |         |         |         |         |         |         |         |         |         |         |         |         |         |       |    |
|----|---------|---------|---------|---------|---------|---------|---------|---------|---------|---------|---------|---------|---------|-------|----|
| 28 | 156.822 | 129.923 | 137.636 | 130.958 | 122.060 | 136.192 | 167.950 | 136.990 | 143.607 | 140.527 | 136.018 | 132.817 | 139.292 | 3.560 | 12 |
| 30 | 152.340 | 129.870 | 138.946 | 127.764 | 121.454 | 136.858 | 166.531 | 132.095 | 143.514 | 141.200 | 136.452 | 136.711 | 138.645 | 3.417 | 12 |
| 32 | 155.724 | 127.133 | 138.900 | 124.401 | 121.051 | 138.643 | 169.478 | 129.111 | 142.158 | 140.534 | 133.468 | 139.960 | 138.380 | 3.914 | 12 |
| 34 | 154.640 | 128.723 | 140.304 | 127.612 | 119.562 | 137.431 | 167.695 | 131.896 | 140.295 | 142.195 | 133.271 | 139.097 | 138.560 | 3.670 | 12 |
| 36 | 152.819 | 127.475 | 136.725 | 125.958 | 116.852 | 137.114 | 166.686 | 135.599 | 140.578 | 139.459 | 131.021 | 137.180 | 137.289 | 3.699 | 12 |
| 38 | 151.319 | 126.347 | 136.930 | 125.821 | 120.996 | 133.280 | 167.527 | 131.704 | 140.996 | 135.684 | 133.244 | 131.469 | 136.277 | 3.620 | 12 |
| 40 | 150.823 | 125.737 | 140.225 | 123.974 | 117.652 | 134.656 | 167.801 | 125.914 | 136.119 | 134.506 | 132.652 | 134.918 | 135.415 | 3.843 | 12 |
| 42 | 151.170 | 125.528 | 131.961 | 121.729 | 116.770 | 135.184 | 161.755 | 133.581 | 138.607 | 134.844 | 130.059 | 133.647 | 134.569 | 3.507 | 12 |
| 44 | 149.665 | 125.736 | 131.382 | 127.109 | 117.534 | 131.900 | 164.701 | 131.465 | 138.055 | 135.260 | 128.736 | 130.371 | 134.326 | 3.536 | 12 |
| 46 | 151.595 | 123.428 | 131.354 | 122.943 | 115.953 | 129.240 | 166.297 | 127.727 | 137.933 | 133.917 | 129.364 | 129.505 | 133.271 | 3.924 | 12 |
| 48 | 150.835 | 120.863 | 132.850 | 122.196 | 112.953 | 133.289 | 163.732 | 125.138 | 136.471 | 137.278 | 128.131 | 133.063 | 133.067 | 3.935 | 12 |
| 50 | 150.837 | 122.683 | 130.353 | 123.013 | 114.840 | 132.105 | 163.971 | 124.079 | 134.211 | 136.154 | 127.115 | 133.697 | 132.755 | 3.840 | 12 |
| 52 | 146.463 | 120.683 | 132.234 | 120.738 | 115.831 | 131.444 | 163.124 | 129.638 | 138.057 | 138.328 | 130.298 | 132.433 | 133.273 | 3.652 | 12 |
| 54 | 146.494 | 119.819 | 131.294 | 122.864 | 112.950 | 132.304 | 166.744 | 122.664 | 137.911 | 133.284 | 127.017 | 130.516 | 131.989 | 4.048 | 12 |
| 56 | 143.949 | 120.431 | 128.799 | 120.548 | 114.925 | 133.280 | 162.446 | 126.125 | 134.775 | 134.652 | 127.363 | 127.323 | 131.218 | 3.613 | 12 |
| 58 | 145.235 | 118.481 | 126.110 | 121.002 | 112.337 | 132.470 | 167.405 | 124.327 | 136.287 | 134.607 | 125.369 | 131.039 | 131.222 | 4.152 | 12 |
| 60 | 145.743 | 118.867 | 130.953 | 120.802 | 115.675 | 129.333 | 165.847 | 122.839 | 136.008 | 132.849 | 128.488 | 130.833 | 131.520 | 3.911 | 12 |
| 62 | 140.776 | 118.414 | 126.819 | 119.168 | 111.995 | 127.728 | 165.665 | 121.525 | 135.714 | 133.609 | 126.176 | 130.026 | 129.801 | 3.999 | 12 |
| 64 | 143.069 | 117.361 | 128.591 | 118.608 | 111.953 | 128.173 | 163.708 | 123.668 | 136.218 | 131.724 | 129.112 | 131.456 | 130.303 | 3.903 | 12 |
| 66 | 141.113 | 114.918 | 121.177 | 119.480 | 112.425 | 129.508 | 162.878 | 125.441 | 134.990 | 134.879 | 127.248 | 129.544 | 129.467 | 3.896 | 12 |
| 68 | 139.740 | 117.041 | 125.867 | 120.364 | 111.631 | 125.950 | 168.296 | 114.705 | 135.289 | 133.096 | 128.865 | 129.896 | 129.228 | 4.316 | 12 |
| 70 | 142.386 | 118.246 | 125.163 | 120.733 | 111.007 | 130.415 | 160.664 | 119.246 | 132.471 | 132.382 | 127.551 | 128.262 | 129.044 | 3.721 | 12 |
| 72 | 139.894 | 115.608 | 122.370 | 119.747 | 114.593 | 126.522 | 163.685 | 122.430 | 131.680 | 131.803 | 128.722 | 127.673 | 128.727 | 3.797 | 12 |
| 74 | 138.301 | 115.969 | 125.653 | 119.192 | 115.221 | 122.903 | 158.721 | 121.322 | 133.015 | 130.313 | 128.878 | 130.096 | 128.299 | 3.422 | 12 |
| 76 | 138.983 | 115.803 | 123.507 | 117.060 | 114.384 | 127.300 | 165.459 | 118.873 | 131.476 | 134.148 | 126.350 | 127.471 | 128.401 | 4.019 | 12 |
| 78 | 137.707 | 117.150 | 122.729 | 120.394 | 115.215 | 123.903 | 162.650 | 120.280 | 129.439 | 131.561 | 125.974 | 125.332 | 127.694 | 3.654 | 12 |
| 80 | 139.285 | 115.974 | 120.771 | 119.937 | 114.266 | 121.811 | 161.559 | 119.259 | 131.194 | 130.222 | 126.513 | 126.299 | 127.257 | 3.726 | 12 |
| 82 | 137.664 | 116.341 | 122.823 | 118.517 | 116.608 | 120.316 | 162.947 | 118.995 | 131.798 | 131.357 | 127.076 | 122.530 | 127.248 | 3.781 | 12 |
| 84 | 136.679 | 115.311 | 122.584 | 118.826 | 113.067 | 123.084 | 162.909 | 117.030 | 130.067 | 129.556 | 124.313 | 127.146 | 126.714 | 3.831 | 12 |
| 86 | 135.979 | 113.735 | 122.375 | 116.876 | 112.506 | 119.643 | 159.155 | 115.831 | 131.837 | 127.761 | 126.428 | 123.134 | 125.438 | 3.706 | 12 |
| 88 | 136.697 | 112.797 | 121.404 | 117.729 | 115.133 | 118.026 | 162.682 | 119.122 | 128.832 | 133.276 | 127.347 | 125.311 | 126.530 | 3.905 | 12 |
| 90 | 132.526 | 113.166 | 125.778 | 118.581 | 114.613 | 119.432 | 163.289 | 117.961 | 130.626 | 131.936 | 129.531 | 124.581 | 126.835 | 3.847 | 12 |
| 92 | 137.851 | 112.969 | 118.781 | 118.538 | 111.848 | 115.472 | 151.495 | 118.677 | 127.228 | 131.625 | 126.876 | 123.676 | 124.586 | 3.312 | 12 |

**Table S14. Current-voltage relationship.**

| <b>Eu</b>                           |        |        |     |        |        |       |       |
|-------------------------------------|--------|--------|-----|--------|--------|-------|-------|
| <b>V<sub>m</sub></b><br><b>(mV)</b> | -80    | -60    | -40 | -20    | 0      | 20    | 40    |
| #1                                  | -2.987 | -1.884 | -1  | -0.430 | 0.064  | 0.613 | 1.098 |
| #2                                  | -2.099 | -1.561 | -1  | -0.250 | 0.312  | 0.729 | 1.259 |
| #3                                  | -3.227 | -2.269 | -1  | -0.184 | 0.031  | 0.523 | 0.668 |
| #4                                  | -2.483 | -1.779 | -1  | -0.485 | -0.036 | 0.608 | 1.185 |
| <b>mean</b>                         | -2.699 | -1.873 | -1  | -0.337 | 0.093  | 0.618 | 1.052 |
| <b>SEM</b>                          | 0.253  | 0.148  | 0   | 0.071  | 0.076  | 0.042 | 0.132 |
| <b>n</b>                            | 4      | 4      | 4   | 4      | 4      | 4     | 4     |

| <b>Ts</b>                           |        |        |     |        |        |       |       |
|-------------------------------------|--------|--------|-----|--------|--------|-------|-------|
| <b>V<sub>m</sub></b><br><b>(mV)</b> | -80    | -60    | -40 | -20    | 0      | 20    | 40    |
| #1                                  | -2.237 | -1.770 | -1  | -0.501 | 0.045  | 0.489 | 0.638 |
| #2                                  | -1.803 | -1.430 | -1  | -0.464 | -0.279 | 0.215 | 0.537 |
| #3                                  | -3.844 | -2.307 | -1  | 0.072  | 0.220  | 1.098 | 1.439 |
| #4                                  | -2.360 | -1.709 | -1  | -0.388 | 0.182  | 0.760 | 1.284 |
| <b>mean</b>                         | -2.561 | -1.804 | -1  | -0.320 | 0.042  | 0.641 | 0.974 |
| <b>SEM</b>                          | 0.444  | 0.183  | 0   | 0.133  | 0.113  | 0.189 | 0.227 |
| <b>n</b>                            | 4      | 4      | 4   | 4      | 4      | 4     | 4     |

**Table S15. NMDA: AMPA ratio.**

| <b>EuVeh</b> |                                        |                                         |                        |
|--------------|----------------------------------------|-----------------------------------------|------------------------|
| <b>cell</b>  | <b>AMPA-mediated currents at -70mV</b> | <b>NMDAR-mediated currents at +40mV</b> | <b>NMDA/AMPA ratio</b> |
| #1           | 296.403                                | 109.410                                 | 0.369                  |
| #2           | 312.454                                | 79.301                                  | 0.254                  |
| #3           | 435.591                                | 338.207                                 | 0.776                  |
| #4           | 513.744                                | 167.617                                 | 0.326                  |
| #5           | 403.828                                | 338.604                                 | 0.838                  |
| #6           | 316.566                                | 79.068                                  | 0.250                  |
| #7           | 248.218                                | 72.403                                  | 0.292                  |
| #8           | 246.740                                | 73.261                                  | 0.297                  |
| #9           | 437.489                                | 161.537                                 | 0.369                  |
| #10          | 273.486                                | 91.298                                  | 0.334                  |
| #11          | 269.163                                | 66.617                                  | 0.248                  |
| #12          | 362.005                                | 90.527                                  | 0.250                  |
| #13          | 263.010                                | 133.375                                 | 0.507                  |
| <b>mean</b>  |                                        |                                         | 0.393                  |
| <b>SEM</b>   |                                        |                                         | 0.055                  |
| <b>n</b>     |                                        |                                         | 13                     |

| <b>TsVeh</b> |                                        |                                         |                        |
|--------------|----------------------------------------|-----------------------------------------|------------------------|
| <b>cell</b>  | <b>AMPA-mediated currents at -70mV</b> | <b>NMDAR-mediated currents at +40mV</b> | <b>NMDA/AMPA ratio</b> |
| #1           | 356.783                                | 4.018                                   | 0.011                  |
| #2           | 366.265                                | 24.544                                  | 0.067                  |
| #3           | 284.423                                | 14.053                                  | 0.049                  |
| #4           | 317.706                                | 23.151                                  | 0.073                  |
| #5           | 255.078                                | 5.871                                   | 0.023                  |
| #6           | 311.629                                | 15.338                                  | 0.049                  |
| #7           | 400.896                                | 5.780                                   | 0.014                  |
| #8           | 345.408                                | 24.990                                  | 0.072                  |
| #9           | 309.176                                | 43.218                                  | 0.140                  |
| #10          | 263.839                                | 26.005                                  | 0.099                  |

|             |         |        |       |
|-------------|---------|--------|-------|
| #11         | 328.711 | 24.297 | 0.074 |
| <b>mean</b> |         |        | 0.061 |
| <b>SEM</b>  |         |        | 0.011 |
| <b>n</b>    |         |        | 11    |

| <b>TsSAG</b> |                                        |                                         |                        |
|--------------|----------------------------------------|-----------------------------------------|------------------------|
| <b>cell</b>  | <b>AMPA-mediated currents at -70mV</b> | <b>NMDAR-mediated currents at +40mV</b> | <b>NMDA/AMPA ratio</b> |
| #1           | 461.656                                | 73.548                                  | 0.159                  |
| #2           | 334.212                                | 54.275                                  | 0.162                  |
| #3           | 311.701                                | 24.125                                  | 0.077                  |
| #4           | 170.940                                | 15.272                                  | 0.089                  |
| #5           | 206.167                                | 54.201                                  | 0.263                  |
| #6           | 238.622                                | 37.419                                  | 0.157                  |
| #7           | 317.473                                | 81.446                                  | 0.257                  |
| #8           | 363.234                                | 17.367                                  | 0.048                  |
| #9           | 308.092                                | 136.531                                 | 0.443                  |
| #10          | 339.516                                | 89.272                                  | 0.263                  |
| #11          | 318.082                                | 39.080                                  | 0.123                  |
| <b>mean</b>  |                                        |                                         | 0.186                  |
| <b>SEM</b>   |                                        |                                         | 0.034                  |
| <b>n</b>     |                                        |                                         | 11                     |
